# Supplementary material for: The Effect of Increasing Topsoil Disturbance on Surface-Active Invertebrate Composition and Abundance under Grazing and Cropping Regimes on Vertisols in North-West New South Wales, Australia
Source: MDPI journal article supplement (doi:10.3390/insects11040237), 2020-04-10
Supplement: s1 [file s1]

Table S1: Typical Vertisol soil profile description

## SITE DETAILS

---

|                           |                                                                                                                                                                                                                                                                                          |
|---------------------------|------------------------------------------------------------------------------------------------------------------------------------------------------------------------------------------------------------------------------------------------------------------------------------------|
| Site Location:            | BVILLE - BLACK CK NR BVILLE RD                                                                                                                                                                                                                                                           |
| Profile Details:          | Soil Landscapes of the Blackville 1:100 000 Sheet Survey (1000640), Profile 63, collected from a gully by Mr Robert Banks on 09 May, 1995                                                                                                                                                |
| Map Reference:            | MGA Grid Reference: Zone 56, 238755E, 6494889N. 8934 BLACKVILLE (1:100000) map sheet.                                                                                                                                                                                                    |
| Physiography:             | gully under littoral complex on alluvium, gravel lithology and used for volun./native pasture. Slope 1.0% (measured), local relief extremely low (< 9m), elevation 380.0 m. Surface condition is cracked, profile is imperfectly drained, erosion hazard is high, and no salting evident |
| Vegetation/Land Use:      | limited clearing at the site, used for volun./native pasture, with cropping, volun./native pasture in the general area                                                                                                                                                                   |
| Surface Condition:        | cracked when described, expected to be cracked when dry, ground cover is 100%                                                                                                                                                                                                            |
| Erosion/Land Degradation: | high; sheet erosion at site is moderate, partly stabilised; scald erosion at site is partly stabilised; tunnel erosion at site is evident, active; streambank erosion at site is evident, active; no salting evident                                                                     |
| Soil Hydrology:           | profile is moderately permeable and imperfectly drained, no free water, run on is high and runoff is high                                                                                                                                                                                |
| Soil Type:                | Epicalcareous Self-mulching Black Vertosol (ASC), Black Earth (GSG)                                                                                                                                                                                                                      |
| Base of observation:      | soil continues                                                                                                                                                                                                                                                                           |
| Profile Field Notes:      | Site = Blackville TSR.                                                                                                                                                                                                                                                                   |

## SOIL DESCRIPTION

---

### Layer 0

0.00 - 0.00 m

Coarse Fragments: not evident,

### Layer 1

Horizon: A1

0.00 - 0.05 m

Texture: heavy clay

Colour: very dark grey (brownish black) (5YR 3/1) [moist] with 0% unspecified mottles

Structure: strong pedality (polyhedral, 2 - 5 mm, fabric is smooth-faced peds), ped coatings are none

Coarse Fragments: not evident,

Segregations: not evident,

Roots: many (25-100/10x10cm) (Root size <1 mm),

Soil fauna: Activity is nil  
Cracks/Macropores: Cracks are evident(width 10-20 mm), macropores are nil  
Moisture/Consistence: dry,  
Erodibility Tests: Crumb (EAT) test showed aggregates slake,  
Field chemical tests: Field pH is 7.5 (Raupach), HCl test showed no effervescence, H<sub>2</sub>O<sub>2</sub> showed no effervescence  
Sample taken: disturbed

**Layer 2**

Horizon: B21

0.05 - 1.40 m Texture: heavy clay  
Colour: very dark grey (brownish black) (5YR 3/1) [moist] with 0% unspecified mottles  
Structure: strong pedality (prismatic, 50 - 100 mm, fabric is smooth-faced peds), ped coatings are common (10-50%)  
Coarse Fragments: not evident,  
Segregations: not evident,  
Roots: many (25-100/10x10cm) (Root size <1 mm),  
Soil fauna: Activity is nil  
Cracks/Macropores: Cracks are evident(width 10-20 mm), macropores are nil  
Moisture/Consistence: dry,  
Erodibility Tests: Crumb (EAT) test showed aggregates slake,  
Field chemical tests: Field pH is 8.5 (Raupach), HCl test showed no effervescence, H<sub>2</sub>O<sub>2</sub> showed effervescence  
Sample taken: disturbed  
Layer Notes: 45 degrees shear planes evident.

**Layer 3**

Horizon: B22k (carbonates)

1.40 - 2.30 m Texture: heavy clay  
Colour: dark reddish brown (5YR 3/3) [moist] with 0% unspecified mottles  
Structure: strong pedality (prismatic, 20 - 50 mm, fabric is smooth-faced peds), ped coatings are common (10-50%)  
Coarse Fragments: sedimentary, many (20-50%), sedimentary, rounded, gravel (6-20 mm),  
Segregations: common (10% - 20%), calcareous,  
Roots: common (10-25/10x10cm) (Root size <1 mm),  
Soil fauna: Activity is nil  
Cracks/Macropores: Cracks are evident(width 10-20 mm), macropores are nil  
Moisture/Consistence: moderately moist,  
Erodibility Tests: Crumb (EAT) test showed aggregates slake,  
Field chemical tests: Field pH is 10.0 (Raupach), HCl test showed no effervescence,  
Sample taken: disturbed  
Layer Notes: 45 degrees shear planes evident. Gravel type = basalt.

**Layer 4**

Horizon: Dk (carbonates)

2.30 - 7.00 m Texture: coarse clayey sand  
Colour: strong brown (bright brown) (7.5YR 5/6) [moist] with 0% unspecified mottles  
Structure: massive (fabric is earthy), ped coatings are none

Coarse Fragments: sedimentary, very abundant (> 90%), sedimentary, rounded, gravel (6-20 mm),

Segregations: many (20% - 50%), calcareous,

Roots: common (10-25/10x10cm) (Root size <1 mm),

Soil fauna: Activity is nil

Cracks/Macropores: Cracks are none(width 10-20 mm), macropores are nil

Moisture/Consistence: dry,

Erodibility Tests: Crumb (EAT) test showed aggregates slake,

Field chemical tests: Field pH is 10.0 (Raupach), HCl test showed no effervescence, H2O2 showed effervescence

Sample taken: disturbed

Layer Notes: Varied sand and gravel layers. Gravel type = basalt.

**Layer 5**

Horizon: 2Dk (carbonates)

7.00 - 9.00 m

Texture: medium clay

Colour: strong brown (brown) (7.5YR 4/6) [moist] with 2% - 10% prominent unspecified grey mottles

Structure: strong pedality (fabric is smooth-faced peds), ped coatings are common (10-50%)

Coarse Fragments: common (10-20%), sedimentary, rounded, gravel (6-20 mm),

Segregations: abundant (> 50%), calcareous,

Roots: common (10-25/10x10cm) (Root size <1 mm),

Soil fauna: Activity is nil

Cracks/Macropores: Cracks are none(width 10-20 mm), macropores are nil

Moisture/Consistence: moist,

Erodibility Tests: Crumb (EAT) test showed aggregates slake,

Field chemical tests: Field pH is 10.0 (Raupach), HCl test showed no effervescence,

Sample taken: disturbed

Layer Notes: 45 degrees shear planed evident Gravel type = basalt.  
Overlies discontinuous travertine layer

**LABORATORY TESTS**

---

None available

F

Report generated on 11/12/2019 at 09:18 PM

---

Table S2: Site level treatment according to season

| Location     | Altitude (m) | Land     |                        |            | Tillage      | Fallow | Season     | Crop Type       |
|--------------|--------------|----------|------------------------|------------|--------------|--------|------------|-----------------|
|              |              | Landuse  | Managemen<br>nt Regime | Practice   |              |        |            |                 |
| Willow Tree  | 330          | Grazing  | NP                     | Native     | None         | None   | Winter '99 | Grasseses       |
| Willow Tree  | 330          | Grazing  | NP                     | Native     | None         | None   | Winter '99 | Grasseses       |
| Blackville   | 360          | Grazing  | NP                     | Native     | None         | None   | Winter '99 | Grasseses       |
| Blackville   | 360          | Grazing  | NP                     | Native     | None         | None   | Winter '99 | Grasses/clovers |
| Bonny Ridge  | 340          | Grazing  | IP                     | Introduced | None         | None   | Winter '99 | Grasses         |
| Bonny Ridge  | 340          | Grazing  | IP                     | Introduced | None         | None   | Winter '99 | Lucerne         |
| Blackville   | 461          | Grazing  | IP                     | Introduced | None         | None   | Winter '99 | Lucerne         |
| Blackville   | 364          | Grazing  | IP                     | Introduced | None         | None   | Winter '99 | Grasses         |
| Willow Tree  | 360          | Cropping | SFZ                    | Rotation   | Zero         | Short  | Winter '99 | Wheat           |
| Willow Tree  | 360          | Cropping | SFZ                    | Rotation   | Zero         | Short  | Winter '99 | Wheat           |
| Quirindi     | 330          | Cropping | SFZ                    | Rotation   | Zero         | Short  | Winter '99 | Fallow          |
| Quirindi     | 330          | Cropping | SFZ                    | Rotation   | Zero         | Short  | Winter '99 | Fallow          |
| Willow Tree  | 340          | Cropping | SFC                    | Rotation   | Conventional | Short  | Winter '99 | Wheat           |
| Willow Tree  | 340          | Cropping | SFC                    | Rotation   | Conventional | Short  | Winter '99 | Wheat           |
| Willow Tree  | 340          | Cropping | SFC                    | Rotation   | Conventional | Short  | Winter '99 | Fallow          |
| Willow Tree  | 340          | Cropping | SFC                    | Rotation   | Conventional | Short  | Winter '99 | Fallow          |
| Blackville   | 380          | Cropping | SFC                    | Rotation   | Conventional | Short  | Winter '99 | Wheat           |
| Blackville   | 380          | Cropping | SFC                    | Rotation   | Conventional | Short  | Winter '99 | Fallow          |
| Spring Ridge | 330          | Cropping | LFZ                    | Rotation   | Zero         | Long   | Winter '99 | Faba beans      |
| Spring Ridge | 330          | Cropping | LFZ                    | Rotation   | Zero         | Long   | Winter '99 | Fallow          |
| Quirindi     | 330          | Cropping | LFC                    | Rotation   | Conventional | Long   | Winter '99 | Wheat           |
| Quirindi     | 330          | Cropping | LFC                    | Rotation   | Conventional | Long   | Winter '99 | Fallow          |
| Blackville   | 360          | Cropping | LFC                    | Rotation   | Conventional | Long   | Winter '99 | Fallow          |
| Blackville   | 360          | Cropping | LFC                    | Rotation   | Conventional | Long   | Winter '99 | Wheat           |
| Willow Tree  | 330          | Grazing  | NP                     | Native     | None         | None   | Spring '99 | Grasseses       |
| Willow Tree  | 330          | Grazing  | NP                     | Native     | None         | None   | Spring '99 | Grasseses       |
| Blackville   | 360          | Grazing  | NP                     | Native     | None         | None   | Spring '99 | Grasseses       |
| Blackville   | 360          | Grazing  | NP                     | Native     | None         | None   | Spring '99 | Grasses/clovers |
| Bonny Ridge  | 340          | Grazing  | IP                     | Introduced | None         | None   | Spring '99 | Grasses         |
| Bonny Ridge  | 340          | Grazing  | IP                     | Introduced | None         | None   | Spring '99 | Lucerne         |
| Blackville   | 461          | Grazing  | IP                     | Introduced | None         | None   | Spring '99 | Lucerne         |
| Blackville   | 364          | Grazing  | IP                     | Introduced | None         | None   | Spring '99 | Grasses         |
| Willow Tree  | 360          | Cropping | SFZ                    | Rotation   | Zero         | Short  | Spring '99 | Wheat           |
| Willow Tree  | 360          | Cropping | SFZ                    | Rotation   | Zero         | Short  | Spring '99 | Wheat           |
| Quirindi     | 330          | Cropping | SFZ                    | Rotation   | Zero         | Short  | Spring '99 | Fallow          |
| Quirindi     | 330          | Cropping | SFZ                    | Rotation   | Zero         | Short  | Spring '99 | Fallow          |
| Willow Tree  | 340          | Cropping | SFC                    | Rotation   | Conventional | Short  | Spring '99 | Wheat           |
| Willow Tree  | 340          | Cropping | SFC                    | Rotation   | Conventional | Short  | Spring '99 | Wheat           |
| Willow Tree  | 340          | Cropping | SFC                    | Rotation   | Conventional | Short  | Spring '99 | Fallow          |
| Willow Tree  | 340          | Cropping | SFC                    | Rotation   | Conventional | Short  | Spring '99 | Fallow          |
| Blackville   | 380          | Cropping | SFC                    | Rotation   | Conventional | Short  | Spring '99 | Wheat           |
| Blackville   | 380          | Cropping | SFC                    | Rotation   | Conventional | Short  | Spring '99 | Fallow          |
| Spring Ridge | 330          | Cropping | LFZ                    | Rotation   | Zero         | Long   | Spring '99 | Faba beans      |
| Spring Ridge | 330          | Cropping | LFZ                    | Rotation   | Zero         | Long   | Spring '99 | Corn            |
| Quirindi     | 330          | Cropping | LFC                    | Rotation   | Conventional | Long   | Spring '99 | Wheat           |
| Quirindi     | 330          | Cropping | LFC                    | Rotation   | Conventional | Long   | Spring '99 | Fallow          |
| Blackville   | 360          | Cropping | LFC                    | Rotation   | Conventional | Long   | Spring '99 | Fallow          |
| Blackville   | 360          | Cropping | LFC                    | Rotation   | Conventional | Long   | Spring '99 | Wheat           |
| Willow Tree  | 330          | Grazing  | NP                     | Native     | None         | None   | Summer '99 | Grasseses       |
| Willow Tree  | 330          | Grazing  | NP                     | Native     | None         | None   | Summer '99 | Grasseses       |
| Blackville   | 360          | Grazing  | NP                     | Native     | None         | None   | Summer '99 | Grasseses       |
| Blackville   | 360          | Grazing  | NP                     | Native     | None         | None   | Summer '99 | Grasses/clovers |
| Bonny Ridge  | 340          | Grazing  | IP                     | Introduced | None         | None   | Summer '99 | Grasses         |
| Bonny Ridge  | 340          | Grazing  | IP                     | Introduced | None         | None   | Summer '99 | Lucerne         |
| Blackville   | 461          | Grazing  | IP                     | Introduced | None         | None   | Summer '99 | Lucerne         |
| Blackville   | 364          | Grazing  | IP                     | Introduced | None         | None   | Summer '99 | Grasses         |
| Willow Tree  | 360          | Cropping | SFZ                    | Rotation   | Zero         | Short  | Summer '99 | Fallow          |
| Willow Tree  | 360          | Cropping | SFZ                    | Rotation   | Zero         | Short  | Summer '99 | Fallow          |
| Quirindi     | 330          | Cropping | SFZ                    | Rotation   | Zero         | Short  | Summer '99 | Sorghum         |
| Quirindi     | 330          | Cropping | SFZ                    | Rotation   | Zero         | Short  | Summer '99 | Sorghum         |
| Willow Tree  | 340          | Cropping | SFC                    | Rotation   | Conventional | Short  | Summer '99 | Fallow          |
| Willow Tree  | 340          | Cropping | SFC                    | Rotation   | Conventional | Short  | Summer '99 | Fallow          |
| Willow Tree  | 340          | Cropping | SFC                    | Rotation   | Conventional | Short  | Summer '99 | Sunflower       |
| Willow Tree  | 340          | Cropping | SFC                    | Rotation   | Conventional | Short  | Summer '99 | Sunflower       |
| Blackville   | 380          | Cropping | SFC                    | Rotation   | Conventional | Short  | Summer '99 | Fallow          |
| Blackville   | 380          | Cropping | SFC                    | Rotation   | Conventional | Short  | Summer '99 | Sorghum         |
| Spring Ridge | 330          | Cropping | LFZ                    | Rotation   | Zero         | Long   | Summer '99 | Fallow          |

|              |     |          |     |            |              |       |            |                 |
|--------------|-----|----------|-----|------------|--------------|-------|------------|-----------------|
| Spring Ridge | 330 | Cropping | LFZ | Rotation   | Zero         | Long  | Summer '99 | Corn            |
| Quirindi     | 330 | Cropping | LFC | Rotation   | Conventional | Long  | Summer '99 | Fallow          |
| Quirindi     | 330 | Cropping | LFC | Rotation   | Conventional | Long  | Summer '99 | Sorghum         |
| Blackville   | 360 | Cropping | LFC | Rotation   | Conventional | Long  | Summer '99 | Sorghum         |
| Blackville   | 360 | Cropping | LFC | Rotation   | Conventional | Long  | Summer '99 | Fallow          |
| Willow Tree  | 330 | Grazing  | NP  | Native     | None         | None  | Autumn '00 | Grasseses       |
| Willow Tree  | 330 | Grazing  | NP  | Native     | None         | None  | Autumn '00 | Grasseses       |
| Blackville   | 360 | Grazing  | NP  | Native     | None         | None  | Autumn '00 | Grasseses       |
| Blackville   | 360 | Grazing  | NP  | Native     | None         | None  | Autumn '00 | Grasses/clovers |
| Bonny Ridge  | 340 | Grazing  | IP  | Introduced | None         | None  | Autumn '00 | Grasses         |
| Bonny Ridge  | 340 | Grazing  | IP  | Introduced | None         | None  | Autumn '00 | Lucerne         |
| Blackville   | 461 | Grazing  | IP  | Introduced | None         | None  | Autumn '00 | Lucerne         |
| Blackville   | 364 | Grazing  | IP  | Introduced | None         | None  | Autumn '00 | Grasses         |
| Willow Tree  | 360 | Cropping | SFZ | Rotation   | Zero         | Short | Autumn '00 | Fallow          |
| Willow Tree  | 360 | Cropping | SFZ | Rotation   | Zero         | Short | Autumn '00 | Fallow          |
| Quirindi     | 330 | Cropping | SFZ | Rotation   | Zero         | Short | Autumn '00 | Sorghum         |
| Quirindi     | 330 | Cropping | SFZ | Rotation   | Zero         | Short | Autumn '00 | Sorghum         |
| Willow Tree  | 340 | Cropping | SFC | Rotation   | Conventional | Short | Autumn '00 | Fallow          |
| Willow Tree  | 340 | Cropping | SFC | Rotation   | Conventional | Short | Autumn '00 | Fallow          |
| Willow Tree  | 340 | Cropping | SFC | Rotation   | Conventional | Short | Autumn '00 | Sunflower       |
| Willow Tree  | 340 | Cropping | SFC | Rotation   | Conventional | Short | Autumn '00 | Sunflower       |
| Blackville   | 380 | Cropping | SFC | Rotation   | Conventional | Short | Autumn '00 | Faba beans      |
| Blackville   | 380 | Cropping | SFC | Rotation   | Conventional | Short | Autumn '00 | Sorghum         |
| Spring Ridge | 330 | Cropping | LFZ | Rotation   | Zero         | Long  | Autumn '00 | Fallow          |
| Spring Ridge | 330 | Cropping | LFZ | Rotation   | Zero         | Long  | Autumn '00 | Corn            |
| Quirindi     | 330 | Cropping | LFC | Rotation   | Conventional | Long  | Autumn '00 | Fallow          |
| Quirindi     | 330 | Cropping | LFC | Rotation   | Conventional | Long  | Autumn '00 | Sorghum         |
| Blackville   | 360 | Cropping | LFC | Rotation   | Conventional | Long  | Autumn '00 | Sorghum         |
| Blackville   | 360 | Cropping | LFC | Rotation   | Conventional | Long  | Autumn '00 | Fallow          |
| Willow Tree  | 330 | Grazing  | NP  | Native     | None         | None  | Winter '00 | Grasseses       |
| Willow Tree  | 330 | Grazing  | NP  | Native     | None         | None  | Winter '00 | Grasseses       |
| Blackville   | 360 | Grazing  | NP  | Native     | None         | None  | Winter '00 | Grasseses       |
| Blackville   | 360 | Grazing  | NP  | Native     | None         | None  | Winter '00 | Grasses/clovers |
| Bonny Ridge  | 340 | Grazing  | IP  | Introduced | None         | None  | Winter '00 | Grasses         |
| Bonny Ridge  | 340 | Grazing  | IP  | Introduced | None         | None  | Winter '00 | Lucerne         |
| Blackville   | 461 | Grazing  | IP  | Introduced | None         | None  | Winter '00 | Lucerne         |
| Blackville   | 364 | Grazing  | IP  | Introduced | None         | None  | Winter '00 | Grasses         |
| Willow Tree  | 360 | Cropping | SFZ | Rotation   | Zero         | Short | Winter '00 | Fallow          |
| Willow Tree  | 360 | Cropping | SFZ | Rotation   | Zero         | Short | Winter '00 | Fallow          |
| Quirindi     | 330 | Cropping | SFZ | Rotation   | Zero         | Short | Winter '00 | Fallow          |
| Quirindi     | 330 | Cropping | SFZ | Rotation   | Zero         | Short | Winter '00 | Fallow          |
| Willow Tree  | 340 | Cropping | SFC | Rotation   | Conventional | Short | Winter '00 | Fallow          |
| Willow Tree  | 340 | Cropping | SFC | Rotation   | Conventional | Short | Winter '00 | Fallow          |
| Willow Tree  | 340 | Cropping | SFC | Rotation   | Conventional | Short | Winter '00 | Wheat           |
| Willow Tree  | 340 | Cropping | SFC | Rotation   | Conventional | Short | Winter '00 | Wheat           |
| Blackville   | 380 | Cropping | SFC | Rotation   | Conventional | Long  | Winter '00 | Barley          |
| Blackville   | 380 | Cropping | SFC | Rotation   | Conventional | Long  | Winter '00 | Fallow          |
| Spring Ridge | 330 | Cropping | LFZ | Rotation   | Zero         | Long  | Winter '00 | Wheat           |
| Spring Ridge | 330 | Cropping | LFZ | Rotation   | Zero         | Long  | Winter '00 | Faba beans      |
| Quirindi     | 330 | Cropping | LFC | Rotation   | Conventional | Long  | Winter '00 | Fallow          |
| Quirindi     | 330 | Cropping | LFC | Rotation   | Conventional | Long  | Winter '00 | Fallow          |
| Blackville   | 360 | Cropping | LFC | Rotation   | Conventional | Long  | Winter '00 | Fallow          |
| Blackville   | 360 | Cropping | LFC | Rotation   | Conventional | Long  | Winter '00 | Fallow          |
| Willow Tree  | 330 | Grazing  | NP  | Native     | None         | None  | Spring '00 | Grasseses       |
| Willow Tree  | 330 | Grazing  | NP  | Native     | None         | None  | Spring '00 | Grasseses       |
| Blackville   | 360 | Grazing  | NP  | Native     | None         | None  | Spring '00 | Grasseses       |
| Blackville   | 360 | Grazing  | NP  | Native     | None         | None  | Spring '00 | Grasses/clovers |
| Bonny Ridge  | 340 | Grazing  | IP  | Introduced | None         | None  | Spring '00 | Grasses         |
| Bonny Ridge  | 340 | Grazing  | IP  | Introduced | None         | None  | Spring '00 | Lucerne         |
| Blackville   | 461 | Grazing  | IP  | Introduced | None         | None  | Spring '00 | Lucerne         |
| Blackville   | 364 | Grazing  | IP  | Introduced | None         | None  | Spring '00 | Grasses         |
| Willow Tree  | 360 | Cropping | SFZ | Rotation   | Zero         | Short | Spring '00 | Fallow          |
| Willow Tree  | 360 | Cropping | SFZ | Rotation   | Zero         | Short | Spring '00 | Fallow          |
| Quirindi     | 330 | Cropping | SFZ | Rotation   | Zero         | Short | Spring '00 | Fallow          |
| Quirindi     | 330 | Cropping | SFZ | Rotation   | Zero         | Short | Spring '00 | Fallow          |
| Willow Tree  | 340 | Cropping | SFC | Rotation   | Conventional | Short | Spring '00 | Fallow          |
| Willow Tree  | 340 | Cropping | SFC | Rotation   | Conventional | Short | Spring '00 | Fallow          |
| Willow Tree  | 340 | Cropping | SFC | Rotation   | Conventional | Short | Spring '00 | Wheat           |
| Willow Tree  | 340 | Cropping | SFC | Rotation   | Conventional | Short | Spring '00 | Wheat           |
| Blackville   | 380 | Cropping | SFC | Rotation   | Conventional | Long  | Spring '00 | Barley          |
| Blackville   | 380 | Cropping | SFC | Rotation   | Conventional | Long  | Spring '00 | Fallow          |

|              |     |          |     |            |              |       |            |                 |
|--------------|-----|----------|-----|------------|--------------|-------|------------|-----------------|
| Spring Ridge | 330 | Cropping | LFZ | Rotation   | Zero         | Long  | Spring '00 | Wheat           |
| Spring Ridge | 330 | Cropping | LFZ | Rotation   | Zero         | Long  | Spring '00 | Faba beans      |
| Quirindi     | 330 | Cropping | LFC | Rotation   | Conventional | Long  | Spring '00 | Fallow          |
| Quirindi     | 330 | Cropping | LFC | Rotation   | Conventional | Long  | Spring '00 | Fallow          |
| Blackville   | 360 | Cropping | LFC | Rotation   | Conventional | Long  | Spring '00 | Fallow          |
| Blackville   | 360 | Cropping | LFC | Rotation   | Conventional | Long  | Spring '00 | Fallow          |
| Willow Tree  | 330 | Grazing  | NP  | Native     | None         | None  | Summer'00  | Grasses         |
| Willow Tree  | 330 | Grazing  | NP  | Native     | None         | None  | Summer'00  | Grasses         |
| Blackville   | 360 | Grazing  | NP  | Native     | None         | None  | Summer'00  | Grasses         |
| Blackville   | 360 | Grazing  | NP  | Native     | None         | None  | Summer'00  | Grasses/clovers |
| Bonny Ridge  | 340 | Grazing  | IP  | Introduced | None         | None  | Summer'00  | Grasses         |
| Bonny Ridge  | 340 | Grazing  | IP  | Introduced | None         | None  | Summer'00  | Lucerne         |
| Blackville   | 461 | Grazing  | IP  | Introduced | None         | None  | Summer'00  | Lucerne         |
| Blackville   | 364 | Grazing  | IP  | Introduced | None         | None  | Summer'00  | Grasses         |
| Willow Tree  | 360 | Cropping | SFZ | Rotation   | Zero         | Short | Summer'00  | Sorghum         |
| Willow Tree  | 360 | Cropping | SFZ | Rotation   | Zero         | Short | Summer'00  | Sorghum         |
| Quirindi     | 330 | Cropping | SFZ | Rotation   | Zero         | Short | Summer'00  | Sorghum         |
| Quirindi     | 330 | Cropping | SFZ | Rotation   | Zero         | Short | Summer'00  | Sorghum         |
| Willow Tree  | 340 | Cropping | SFC | Rotation   | Conventional | Short | Summer'00  | Sorghum         |
| Willow Tree  | 340 | Cropping | SFC | Rotation   | Conventional | Short | Summer'00  | Sorghum         |
| Willow Tree  | 340 | Cropping | SFC | Rotation   | Conventional | Short | Summer'00  | Sorghum         |
| Willow Tree  | 340 | Cropping | SFC | Rotation   | Conventional | Short | Summer'00  | Sorghum         |
| Blackville   | 380 | Cropping | SFC | Rotation   | Conventional | Short | Summer'00  | Fallow          |
| Blackville   | 380 | Cropping | SFC | Rotation   | Conventional | Short | Summer'00  | Sorghum         |
| Spring Ridge | 330 | Cropping | LFZ | Rotation   | Zero         | Long  | Summer'00  | Fallow          |
| Spring Ridge | 330 | Cropping | LFZ | Rotation   | Zero         | Long  | Summer'00  | Fallow          |
| Quirindi     | 330 | Cropping | LFC | Rotation   | Conventional | Long  | Summer'00  | Sorghum         |
| Quirindi     | 330 | Cropping | LFC | Rotation   | Conventional | Long  | Summer'00  | Fallow          |
| Blackville   | 360 | Cropping | LFC | Rotation   | Conventional | Long  | Summer'00  | Fallow          |
| Blackville   | 360 | Cropping | LFC | Rotation   | Conventional | Long  | Summer'00  | Fallow          |
| Willow Tree  | 330 | Grazing  | NP  | Native     | None         | None  | Autumn '01 | Grasses         |
| Willow Tree  | 330 | Grazing  | NP  | Native     | None         | None  | Autumn '01 | Grasses         |
| Blackville   | 360 | Grazing  | NP  | Native     | None         | None  | Autumn '01 | Grasses         |
| Blackville   | 360 | Grazing  | NP  | Native     | None         | None  | Autumn '01 | Grasses/clovers |
| Bonny Ridge  | 340 | Grazing  | IP  | Introduced | None         | None  | Autumn '01 | Grasses         |
| Bonny Ridge  | 340 | Grazing  | IP  | Introduced | None         | None  | Autumn '01 | Lucerne         |
| Blackville   | 461 | Grazing  | IP  | Introduced | None         | None  | Autumn '01 | Lucerne         |
| Blackville   | 364 | Grazing  | IP  | Introduced | None         | None  | Autumn '01 | Grasses         |
| Willow Tree  | 360 | Cropping | SFZ | Rotation   | Zero         | Short | Autumn '01 | Sorghum         |
| Willow Tree  | 360 | Cropping | SFZ | Rotation   | Zero         | Short | Autumn '01 | Sorghum         |
| Quirindi     | 330 | Cropping | SFZ | Rotation   | Zero         | Short | Autumn '01 | Sorghum         |
| Quirindi     | 330 | Cropping | SFZ | Rotation   | Zero         | Short | Autumn '01 | Sorghum         |
| Willow Tree  | 340 | Cropping | SFC | Rotation   | Conventional | Short | Autumn '01 | Sorghum         |
| Willow Tree  | 340 | Cropping | SFC | Rotation   | Conventional | Short | Autumn '01 | Sorghum         |
| Willow Tree  | 340 | Cropping | SFC | Rotation   | Conventional | Short | Autumn '01 | Sorghum         |
| Willow Tree  | 340 | Cropping | SFC | Rotation   | Conventional | Short | Autumn '01 | Sorghum         |
| Blackville   | 380 | Cropping | SFC | Rotation   | Conventional | Short | Autumn '01 | Fallow          |
| Blackville   | 380 | Cropping | SFC | Rotation   | Conventional | Short | Autumn '01 | Sorghum         |
| Spring Ridge | 330 | Cropping | LFZ | Rotation   | Zero         | Long  | Autumn '01 | Fallow          |
| Spring Ridge | 330 | Cropping | LFZ | Rotation   | Zero         | Long  | Autumn '01 | Fallow          |
| Quirindi     | 330 | Cropping | LFC | Rotation   | Conventional | Long  | Autumn '01 | Sorghum         |
| Quirindi     | 330 | Cropping | LFC | Rotation   | Conventional | Long  | Autumn '01 | Fallow          |
| Blackville   | 360 | Cropping | LFC | Rotation   | Conventional | Long  | Autumn '01 | Fallow          |
| Blackville   | 360 | Cropping | LFC | Rotation   | Conventional | Long  | Autumn '01 | Fallow          |

Table S3: Mean abundance (standard error of mean) of invertebrate taxa recorded in pitfall traps (total number per field), across land use and agricultural management regimes. Each data point was the total abundance of 20 pitfall traps per field. Each field was sampled eight times (once each season over two years), the number of replicates for each land use type or management regime is dependent on groupings). For each taxa, where there were significant differences ( $P < 0.05$ ). Within rows and category, means followed by different letters were significantly different at  $P < 0.05$ . Comparison of mean (Tukey's HSD) were completed within the category of land use type, and agricultural management regimes. NP = native pasture, IP = introduced pasture, LFZ = long fallow zero tillage, SFZ = short fallow zero tillage, LFC = long fallow conventional tillage, SFC = short fallow conventional tillage.

| Taxa                            | Land Use Type    |                  | Management Regimes |                   |                   |                  |                  |                  |
|---------------------------------|------------------|------------------|--------------------|-------------------|-------------------|------------------|------------------|------------------|
|                                 | Graz-<br>ing     | Cropping         | NP                 | IP                | LFZ               | SFZ              | LFC              | SFC              |
| Formicidae<br>(Ants)            | 383.2a<br>(70.6) | 157.0b<br>(16.7) | 517.8a<br>(133)    | 248.6ab<br>(36.3) | 206.6ab<br>(72.3) | 181.9b<br>(35)   | 109.7b<br>(36.3) | 155.3b<br>(24.4) |
| <i>Iridomyrmex</i>              | 191.0a<br>(54.4) | 57.5b<br>(8.1)   | 359.3a<br>(101)    | 22.8b<br>(5.6)    | 24.5b<br>(15.7)   | 59.2b<br>(17.4)  | 96.5b<br>(22.1)  | 41.3b<br>(8.1)   |
| <i>Pheidole</i>                 | 118.6a<br>(22.3) | 32.5b<br>(9.4)   | 128a<br>(38.8)     | 109ab<br>(22.5)   | 120ab<br>(71.4)   | 22.2bc<br>(4.9)  | 5.4c<br>(2.9)    | 28.2bc<br>(3.8)  |
| Diptera                         | 72.3<br>(10.0)   | 88.0<br>(7.1)    | 82.2ab<br>(15.0)   | 62.4b<br>(8.2)    | 111.9ab<br>(20.5) | 47.8b<br>(5.7)   | 121.7a<br>(8.2)  | 84.5ab<br>(13.1) |
| <i>Rhytidoponera</i> .          | 64.1a<br>(13.5)  | 63.0a<br>(11.3)  | 20.8bc<br>(5.3)    | 107.5a<br>(24.3)  | 59.8ab<br>(16.5)  | 97.3ab<br>(28.7) | 0.84c<br>(0.3)   | 82.6ab<br>(21.0) |
| Coleoptera                      | 45.1b<br>(5.5)   | 100.7a<br>(17.1) | 53.7b<br>(9.8)     | 36.5b<br>(4.8)    | 74.5ab<br>(13.7)  | 67.7ab<br>(18.3) | 106.7a<br>(18.5) | 127.5a<br>(42.0) |
| Orthoptera                      | 32.8a<br>(4.4)   | 20.7b<br>(3.1)   | 39.0a<br>(6.8)     | 26.7b<br>(5.5)    | 23.5b<br>(9.6)    | 23.5b<br>(5.6)   | 18.1b<br>(7.3)   | 19.7b<br>(4.7)   |
| Araneae                         | 29.0a<br>(3.1)   | 20.0b<br>(1.7)   | 23.8ab<br>(3.4)    | 34.2a<br>(5.0)    | 20.5b<br>(4.4)    | 16.4b<br>(1.9)   | 23.7ab<br>(4.4)  | 19.9b<br>(2.8)   |
| Hemiptera                       | 24.7<br>(8.2)    | 14.8<br>(7.7)    | 20.3<br>(8.2)      | 29.1<br>(14.2)    | 9.1<br>(3.4)      | 4.8<br>(1.1)     | 36.6<br>(30.8)   | 8.8<br>(1.7)     |
| Acarina                         | 18.2a<br>(4.3)   | 7.9b<br>(3.2)    | 8.7b<br>(1.7)      | 27.8a<br>(8.1)    | 2.3b<br>(0.9)     | 5.3b<br>(1.8)    | 8.3b<br>(2.8)    | 11.4b<br>(8.2)   |
| Hymenoptera<br>(excluding ants) | 9.5a<br>(1.0)    | 7.4a<br>(1.2)    | 9.7ab<br>(1.4)     | 9.3ab<br>(1.4)    | 10.4ab<br>(4.1)   | 3.8b<br>(0.8)    | 13.3a<br>(3.8)   | 5.0b<br>(0.7)    |
| Diplopoda                       | 4.4<br>(2.3)     | 2.9<br>(0.7)     | 3.0<br>(1.7)       | 5.8<br>(4.4)      | 2.7<br>(0.8)      | 6.2<br>(2.4)     | 1.7<br>(0.7)     | 1.6<br>(0.3)     |
| Isopoda                         | 3.5a<br>(1.2)    | 1.2b<br>(0.2)    | 1.6ab<br>(0.7)     | 5.5a<br>(2.3)     | 0.6b<br>(0.5)     | 1.2b<br>(0.5)    | 1.5ab<br>(0.6)   | 1.3b<br>(0.3)    |
| Dermaptera                      | 2.3b<br>(0.7)    | 5.2a<br>(0.9)    | 0.2b<br>(0.1)      | 4.3ab<br>(1.4)    | 1.6ab<br>(0.6)    | 6.3ab<br>(0.9)   | 6.4a<br>(1.8)    | 6.3a<br>(1.9)    |
| Thysanoptera                    | 2.2<br>(0.7)     | 2.0<br>(0.4)     | 3.5<br>(1.4)       | 0.8<br>(0.3)      | 4.1<br>(2.5)      | 1.9<br>(0.6)     | 2.4<br>(0.8)     | 1.1<br>(0.3)     |
| Blattodea                       | 0.6 b<br>(0.2)   | 3.9a<br>(0.9)    | 1.2bc<br>(0.4)     | 0.1c<br>(0.04)    | 9.3a<br>(4.7)     | 6.2ab<br>(2.5)   | 1.1bc<br>(0.3)   | 2.5abc<br>(0.5)  |
| Chilopoda                       | 0.5<br>(0.1)     | 1.1<br>(0.2)     | 0.2<br>(0.1)       | 0.8<br>(0.2)      | 1.1<br>(0.4)      | 1.3<br>(0.4)     | 0.4<br>(0.1)     | 1.3<br>(0.4)     |
| Mecoptera                       | 0.1<br>(0.3)     | 0.2<br>(1.6)     | 0.03<br>(0.03)     | 0.09<br>(0.07)    | 1.1<br>(1.1)      | 0.0<br>(0.0)     | 0.2<br>(0.2)     | 0.2<br>(0.1)     |

Table S4: Mean abundance (standard error of mean) of invertebrate taxa recorded in pitfall traps (total number per field), across season. Each data point was the total abundance of 20 pitfall traps per field. Each field was sampled once in each of the four seasons and repeated in the following calendar year, n = 48). Within rows and category, means followed by different letters were significantly different at  $P < 0.05$ . Comparison of mean (Tukey's HSD) were completed within the category of season. Also, within rows, means followed by different letters were significantly different at  $P < 0.05$ .

| Taxa                         | Season            |                  |                  |                  |
|------------------------------|-------------------|------------------|------------------|------------------|
|                              | Autumn            | Winter           | Spring           | Summer           |
| Formicidae<br>(Ants)         | 192.9b<br>(23.2)  | 100.3b<br>(21.3) | 180.5b<br>(24.3) | 455.8a<br>(93.8) |
| Diptera                      | 104.6ab<br>(14.6) | 131.6a<br>(13.9) | 51.3bc<br>(13.9) | 44.9c<br>(13.9)  |
| <i>Rhytidoponera</i>         | 76.2a<br>(19.4)   | 26.6b<br>(7.6)   | 72.9a<br>(19.2)  | 77.8a<br>(19.9)  |
| <i>Iridomyrmex</i>           | 68.2b<br>(14.8)   | 30.6b<br>(9.0)   | 61.3b<br>(12.7)  | 248a<br>(70.9)   |
| <i>Pheidole</i>              | 59.3b<br>(8.6)    | 42.8b<br>(16.8)  | 45.2b<br>(8.1)   | 120a<br>(33.8)   |
| Orthoptera                   | 53.6a<br>(6.8)    | 2.2c<br>(0.4)    | 17.bc<br>(2.4)   | 26.3b<br>(5.0)   |
| Coleoptera                   | 39.2b<br>(5.0)    | 134.8a<br>(42.6) | 93.6ab<br>(13.3) | 61.1ab<br>(9.9)  |
| Hemiptera                    | 25.1<br>(10.7)    | 8.3<br>(2.1)     | 30.0<br>(20.5)   | 9.0<br>(2.4)     |
| Araneae                      | 21.8a<br>(4.2)    | 13.3b<br>(4.0)   | 27.7a<br>(4.0)   | 29.4a<br>(4.0)   |
| Dermaptera                   | 10.3a<br>(2.1)    | 0.8b<br>(0.2)    | 3.1b<br>(0.9)    | 2.8b<br>(0.5)    |
| Hymenoptera (excluding ants) | 9.1ab<br>(0.9)    | 3.0c<br>(0.7)    | 13.6a<br>(2.8)   | 6.7bc<br>(1.0)   |
| Acarina                      | 4.7b<br>(0.9)     | 24.4a<br>(9.7)   | 5.5b<br>(1.2)    | 10.9ab<br>(2.3)  |
| Diplopoda                    | 4.2<br>(1.4)      | 6.2<br>(3.2)     | 2.3<br>(0.6)     | 0.88<br>(0.2)    |
| Blattodea                    | 3.8<br>(1.3)      | 1.6<br>(0.6)     | 4.1<br>(1.9)     | 1.9<br>(0.4)     |
| Thysanoptera                 | 1.3<br>(0.7)      | 2.4<br>(0.7)     | 3.2<br>(1.0)     | 1.3<br>(0.4)     |
| Chilopoda                    | 0.9ab<br>(0.3)    | 0.5b<br>(0.3)    | 1.6a<br>(0.3)    | 0.5b<br>(0.1)    |
| Isopoda                      | 0.5<br>(0.2)      | 1.6<br>(0.5)     | 2.6<br>(0.8)     | 3.2<br>(1.4)     |
| Mecoptera                    | 0.0<br>(0.0)      | 0.2<br>(0.1)     | 0.5<br>(0.4)     | 0.04<br>(0.03)   |
